# Supplementary material for: Zero thermal expansion in (1−x)PbTiO3–xBi(Mg,Ti)1/2O3 piezoceramics
Source: Royal Society of Chemistry journal article supplement (doi:10.1039/b816822a), 2009-01-01
Supplement: b816822a.pdf [file b816822a.pdf]

Supporting information for:

## **Zero thermal expansion in the $(1-x)\text{PbTiO}_3-x\text{Bi}(\text{Mg},\text{Ti})_{1/2}\text{O}_3$ piezoceramics**

**Penghao Hu<sup>a</sup>, Jun Chen<sup>a</sup>, Xueyi Sun<sup>a</sup>, Jinxia Deng<sup>a</sup>, Xi Chen<sup>a</sup>, Ranbo Yu<sup>a</sup>, Lijie Qiao<sup>b</sup> and Xianran Xing<sup>a,c,\*</sup>**

<sup>a</sup> *Department of Physical Chemistry, University of Science and Technology Beijing, Beijing 100083, China.*

<sup>b</sup> *Key Laboratory of Environmental Fracture, Ministry of Education of China, University of Science and Technology Beijing, Beijing 100083, China.*

<sup>c</sup> *State Key Laboratory for Advanced Metals and Materials, University of Science and Technology Beijing, Beijing 100083, China.*

*\*Corresponding author*

*Electronic mail: xing@ustb.edu.cn. Tel.: +86-10-62334200. Fax: +86-10-62332525.*

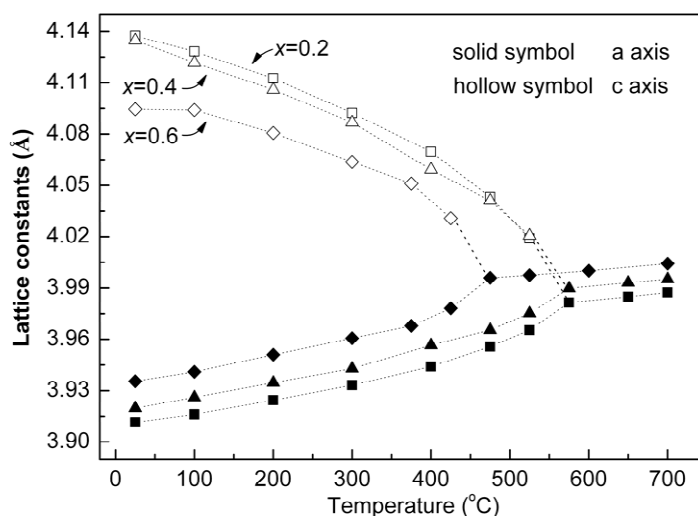

**Figure S1.** Unit cell volumes of  $(1-x)\text{PbTiO}_3-x\text{Bi}(\text{Mg,Ti})_{1/2}\text{O}_3$  ( $x=0.2, 0.4, 0.6$ ) as function of temperature in the range of 25-700°C.

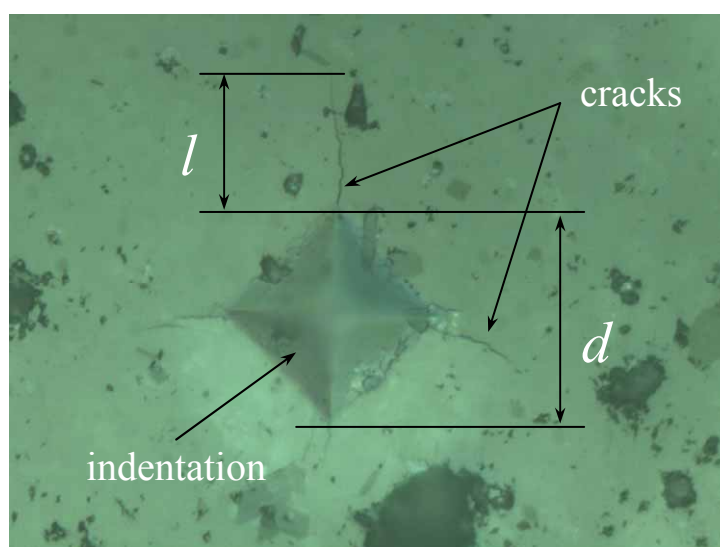

**Figure S2.** A typical photo taken by microscope camera in the Vickers indentation hardness measurement. The fracture toughness ( $K_{IC}$ ) of the ceramics were characterized by indentation method carried on the Digital Microhardness tester (HVS-1000) with different loads and 20 s of dwell time. After loading, there would be indentation on the surface of the ceramics, and there were cracks extended from the indentation's tips. The hardness could be directly numerated from the instrument and the  $K_{IC}$  were calculated by following equation

$$K_{IC} = \frac{0.0624P}{dl^{3/2}}$$

where  $d$  is diagonal length of the indentation,  $l$  is the crack's vertical length measured from the tip of indentation. The  $d$  and  $l$  were measured directly from the photos taken by microscope camera. Generally, the longest crack was measured for the  $l$  magnitude. The  $K_{IC}$  obtained under different loads were counted for the average and exhibited in figure 5b, the error limits showed the results'

distribution.

Generally, the intrinsic thermal expansion  $\alpha_v$  and the apparent thermal expansion  $\alpha_l$  meet the relationship:  $\alpha_v \approx 3\alpha_l$  which derived from the following computations:

For  $\alpha_v = \frac{1}{V_0} \frac{dV}{dT}$ ,  $\alpha_l = \frac{1}{l_0} \frac{dl}{dT}$  where  $V$  is the unit cell volume,  $l$  is the one-dimensional

length of the ceramic sample,  $T$  is the temperature. Actually, the samples measured in the dilatometer were club-shaped ceramics, which were pressed and sintered from the finished powder. Because there were unit cells in any orientation, the ceramic samples could be considered as isotropic; consequently, the thermal expansion would be isotropic as well. Thus, the apparent thermal expansion was independent of the shape of the samples. The volumetric thermal expansion is certainly proportional to the one-dimensional thermal expansion.

Define  $V_1=l^3$ , ignoring the sintered defects in the ceramics,  $V_1=k \cdot V$  ( $k$  is a coefficient which can be interpreted as the quantity of the unit cells a sample which volume is  $V_1$  contains). In the actual samples, considering the pore, the  $k$  will be a little bigger.

$$\alpha_v = \frac{1}{V_0} \frac{d(V)}{dT} = \frac{k}{V_{1_0}} \frac{d\left(\frac{V_1}{k}\right)}{dT} = \frac{1}{V_{1_0}} \frac{d(V_1)}{dT} = \frac{1}{l_0^3} \frac{d(l^3)}{dT} = \frac{1}{l_0^3} \frac{3l^2 dl}{dT} \approx \frac{3}{l_0} \frac{dl}{dT} = 3\alpha_l \quad (l_0 \approx l)$$
